# Supplementary material
Source: PubMed Central journal article supplement (PMC3296239)
Supplement: supp_111.136069_TableS1.pdf [file supp_111.136069_TableS1.pdf]

**Table S1 Whole genome sequencing of pooled DNA from wild-type zebrafish strains**

| Wild-type pool   | # reads <sup>a</sup><br>(millions) | Genome<br>coverage | # SNPs <sup>b</sup><br>(per kb) | % het <sup>c</sup> |
|------------------|------------------------------------|--------------------|---------------------------------|--------------------|
| Tü <sup>B</sup>  | 97                                 | 5.1x               | 2.6                             | 88                 |
| Tü <sup>G</sup>  | 81                                 | 4.1x               | 2.5                             | 89                 |
| WIK <sup>B</sup> | 96                                 | 4.1x               | 2.9                             | 64                 |
| WIK <sup>G</sup> | 81                                 | 4.0x               | 3.5                             | 73                 |
| AB               | 90                                 | 4.6x               | 3.3                             | 79                 |
| TLF              | 91                                 | 3.8x               | 2.9                             | 56                 |

<sup>a</sup>Number of 100 bp reads obtained by Illumina single end sequencing. <sup>b</sup>Number of positions at which at least one read representing an alternate allele was observed. Only positions at the 7.6 million SNP sites identified in this study were considered. <sup>c</sup>Percentage of SNPs that were heterogeneous (i.e., both reference-genome and alternate alleles were represented)
