# Supplementary material
Source: PubMed Central journal article supplement (PMC3296239)
Supplement: supp_111.136069_TableS3.pdf [file supp_111.136069_TableS3.pdf]

**Table S3 SSLP and SNP marker linkage data**

| Zebrafish mutant | Chr <sup>a</sup> | Region of homogeneity (Mb) <sup>b</sup> | Marker <sup>c</sup> | Position <sup>d</sup> (Mb) | Recombinants/meiosis <sup>e</sup> |
|------------------|------------------|-----------------------------------------|---------------------|----------------------------|-----------------------------------|
| <i>moto</i>      | 3                | 19-36.6                                 | z9964               | 34.3                       | 2/90                              |
| <i>wdd</i>       | 8                | 51.8-55                                 | <i>bmp1a</i>        | 53.5                       | 0/66                              |
| <i>hlw</i>       | 8                | 43-47                                   | z25210              | 43                         | 2/44                              |
|                  |                  |                                         | z7130               | 45.6                       | 1/46                              |
| <i>frnt</i>      | 4                | 15-27.8                                 | z11538              | 23.1                       | 3/44                              |
|                  |                  |                                         | z20450              | 24.4                       | 2/44                              |
| <i>sump</i>      | 16               | 41.8-51.2                               | z8819               | 41.3                       | 2/56                              |
|                  |                  |                                         | z15739              | 43.9                       | 0/56                              |
|                  |                  |                                         | z4670               | 50.8                       | 1/40                              |
|                  |                  |                                         | z6854               | 50.6                       | 1/40                              |

<sup>a</sup>Chromosome showing the highest mapping score. <sup>b</sup>Interval on the chromosome showing homogeneity. <sup>c</sup>Marker used to confirm linkage. <sup>d</sup>Marker position on the Chromosome in Mb. <sup>e</sup>Recombinants identified for each marker in the number of meiosis tested.
